# Supplementary material for: Human Intellectual Disability Genes Form Conserved Functional Modules in Drosophila
Source: PLoS Genet. 2013 Oct 31;9(10):e1003911. doi: 10.1371/journal.pgen.1003911 (PMC3814316; doi:10.1371/journal.pgen.1003911)
Supplement: Table S2 — Novelty of functional and histological data on 25 Drosophila ID genes with phototaxis defects. Table S2 indicates previous reports on the role of the identified Drosophila ID genes in phototaxis, ERG or other electrophysiology experiments, and related findings in mammalian systems. The novelty of eye morphology defects (FlyBase) is also indicated. Note that, to the best of our knowledge, most findings are novel. (XLS) [file pgen.1003911.s007.xls]

## Sheet: Table S2
Table S2
Fly symbol	CG	Gene name (in bold if not previously implicated in fly retina integrity or neurophysiology across organisms)	Phototaxis defect (this study)	ERG defect (this study)	Is the functional defect (phototaxis/ERG) novel? Source: Flybase	Mammalian data, is a defect in basal neurotransmission novel? Source: Pubmed	Structural defect (adult eye histology, this study)	Is a structural defect novel? Source: Flybase
sec71	CG7578	ARFGEF2	Yes	Yes	Yes	Yes	Yes	Yes
Vha100-1	CG1709	ATP6V0A2	Yes	Yes	No, similar phenotypes in phototaxis and ERG were already described (Hiesinger et al., 2005, PMID:15907473).	Yes	Yes	No, histological defects have been described (Williamson et al., 2010, PMID:20513768): loss of Vha100-1 leads to slow, adult-onset degeneration of photoreceptors, with formation of heterogeneous membrane structures. However, the strongly vacuolated pigment cell phenotype has not been described.
CG31739	CG31739	DARS2	Yes	Yes	Yes	Yes	Yes	Yes
CG7430	CG7430	DLD	Yes	Yes	Yes	Yes	Yes	Yes
Pu	CG9441	GCH1	Yes	Yes	Yes	Yes	Yes	Yes
Cchl	CG6022	HCCS	Yes	Yes	Yes	Yes	Yes	Yes, only an external eye phenotype has previously been described in a cchl mutant (glossy eyes, similar to our fused ommatidia phenotype, but was not observed for Cchl in our screen)(liao et al., 2006, PMID:16849596). Histology has not been performed .
CG11796	CG11796	HPD	Yes	n.d.	n.d.	n.d.	n.d.	n.d.
wb	CG15288	LAMA2	Yes	Yes	Yes	Yes. Evoked Electrophysiological recordings in cerebellar slice preparations were reported, but showed no difference to controls. There was a difference in long term plasticity in purkinje cells, but no difference in basal transmission(Anderson et al., 2005, PMID:15823249).	Yes	No, a defect in rhabdomere organisation was already described (Martin et al., 1999, PMID:10189378). An irregular shape of the rhabdomeres was also found in this study.
CG7830	CG7830	MAGT1	Yes	Yes	Yes	Yes	Yes	Yes
trpml	CG8743	MCOLN1	Yes	Yes	Yes, the phototaxis and ERG defects have not been reported, but decreased synaptic transmission (EJCs) at the neuromuscular junction has been described (Venkatachalam et al., 2008, PMID:19041749).	No, ERG defects were also observed in mucolipidosis IV patients (Pradhan et al., 2002, PMID:11786056). In a Mcoln1 knockout mouse, retinal degeneration and neurological defects were reported(Venugopal et al., 2007, PMID:17924347). From these Mcoln1 (-/-) mouse embryos a neuronal cell model was generated. In these neurons a macroautophagy phenotype was found, but no functional phenotype was report…	Yes	No, Venkatachalam et al., described a late neurodegenerative phenotype (at 21 days post eclosion), with less than 7 rhabdomeres per ommatidium and multilamellar and multivesicular bodies (Venkatachalam et al., 2008, PMID:19041749). An early vacuolar phenotype as desribed in this study, was not reported
CG1970	CG1970	NDUFS2	Yes	Yes	Yes	Yes	Yes	Yes
CG9140	CG9140	NDUFV1	Yes	Yes	Yes	Yes	Yes	Yes
scro	CG17594	NKX2-1	Yes	Yes	Yes	Yes	Yes	Yes
Lis-1	CG8440	PAFAH1B1	Yes	Yes	Yes	No, in Lis1 mice a two fold increase in frequency of spontaneous and mini EPSCs was reported, as well as enhanced facilitation at excitatory synapses upon stimulation (Greenwood et al., 2009, PMID:19938147). Hyperexcitability was also reported by Fleck et al., 2000 (PMID:10729324) and Jones and Baraban, 2009 (PMID:19515951).	Yes	No, phenotype manifesting in photoreceptor cell & nucleus, and in neuron differentiation is discribed. Lis1 plays a role in nuclear migration in R cells (Houalla et al., 2005, PMID:15582780). Furthermore Marrone et al., described abnormalities in axonal pathfinding in the eye, vacuoles in the retina and identified shorter rhabdomers (Marrone et al., 2011, PMID:21943192). This is in agreement with…
CG6486	CG6486	PEX7	Yes	Yes	Yes	Yes	Yes	Yes
CG16758	CG16758	PNP	Yes	No	n.d.	n.d.	n.d.	n.d.
CG6767	CG6767	PRPS1	Yes	Yes	Yes	Yes	Yes	Yes
qm	CG8593	RPL10	Yes	Yes	Yes	Yes	Yes	Yes
S6kII	CG17596	RPS6KA3	Yes	Yes	Yes, no data on neuronal phsiology in fly are available, but learning defects (Putz et al., 2004, PMID:15525759) have been reported.	No, RSK2-PDZ domain interactions are functionally necessary for synaptic transmission (Thomas et al., 2005, PMID:16217014). Furthermore in hippocampal slices from Rsk2-KO mice, Mehmood et al., reported reduced AMPA mediated synaptic transmission (Mehmood et al., 2011, PMID:21116650).	Yes	No, structural defects were already reported. S6kII flies have irregular ommatidia organisation, and ommatidia containing an increased number of photoreceptor rhabdomeres (Kim et al., 2006, PMID:16763554). In our study, we did not observe ectopic rhabdomeres, This difference might be due to the different genetic conditions (knockdown behind the morphogenic furrow versus S6KII null mutant).
ash1	CG8887	SETBP1	Yes	No	n.d.	n.d.	n.d.	n.d.
usnp	CG11173	SNAP29	Yes	Yes	Yes	No, defects in synaptic transmission have been reported by two mammalian ex vivo studies (Su et al., 2001, PMID:11707603; Pan et al., 2005, PMID:15890653). However, these studies report an increase in evoked transmission. The decreased synaptic transmission in our study thus reveals novel aspects and might result from excitotoxicity at earlier stages in development.	Yes	Yes
tbce	CG7861	TBCE	Yes	Yes	Yes, the phototaxis and ERG defects are novel, but reduced amplitude of excitatory junction potentials (EJPs) at NMJs were already described (Jin et al., 2009, PMID:19297412).	Yes	Yes	Yes
CG3165	CG3165	TREX1	Yes	Yes	Yes	Yes	Yes	Yes
alphaTub84B	CG1913	TUBA1A	Yes	No	n.d.	n.d.	n.d.	n.d.
CG7830	CG7830	TUSC3	Yes	Yes	Yes	Yes	Yes	Yes
